# Supplementary material
Source: Springer Nature journal article supplement (https://www.springermedizin.de/resource/supplementary/12904_2014_221_MOESM1_ESM.pdf/9517800)
Supplement: MOESM1 [file 9517800]

## Themes

## Subthemes

Communicating the pain

Adopting roles in pain assessment

Identifying and describing the pain

Revealing and concealing pain

Monitoring the pain

Finding a solution

Navigating roles in pain control

Implementing pain control strategies

Dealing with side effects

Believing in pain control
